# Supplementary material for: IgG anti-RBD levels during 8-month follow-up post-vaccination with BNT162b2 and mRNA-1273 vaccines in healthcare workers: A one-center study
Source: PubMed Central journal article supplement (PMC9748346; doi:10.3389/fcimb.2022.1035155), 2022-11-30
Supplement: DataSheet_1.pdf [file DataSheet_1.pdf]

## Supplementary Material

|           |        | BNT162b2 |         |         |         |         |         |         |         |         |         | mRNA-1273 |         |         |         |         |         |         |         |         |         |         |         |         |
|-----------|--------|----------|---------|---------|---------|---------|---------|---------|---------|---------|---------|-----------|---------|---------|---------|---------|---------|---------|---------|---------|---------|---------|---------|---------|
|           |        | Male     |         |         |         |         | Female  |         |         |         |         | Male      |         |         |         |         | Female  |         |         |         |         |         |         |         |
|           |        | Years    | 20-29   | 30-39   | 40-49   | 50-59   | 60-69   | 20-29   | 30-39   | 40-49   | 50-59   | 60-69     | 20-29   | 30-39   | 40-49   | 50-59   | 60-69   | 20-29   | 30-39   | 40-49   | 50-59   |         | 60-69   |         |
| BNT162b2  | Male   | 20-29    |         | >0.9999 | >0.9999 | 0.0017  | 0.0013  | >0.9999 | >0.9999 | 0.0510  | 0.2532  | 0.1520    | >0.9999 | >0.9999 | >0.9999 | >0.9999 | >0.9999 | >0.9999 | >0.9999 | >0.9999 | >0.9999 | >0.9999 | >0.9999 | 0.9974  |
|           |        | 30-39    | >0.9999 |         | >0.9999 | 0.1245  | 0.0747  | >0.9999 | >0.9999 | >0.9999 | >0.9999 | >0.9999   | >0.9999 | >0.9999 | >0.9999 | >0.9999 | 0.1289  | >0.9999 | >0.9999 | 0.0028  | 0.0006  |         |         |         |
|           |        | 40-49    | 0.0502  | >0.9999 |         | >0.9999 | >0.9999 | 0.4556  | >0.9999 | >0.9999 | >0.9999 | >0.9999   | >0.9999 | >0.9999 | >0.9999 | 0.0307  | 0.2700  | 0.0006  | 0.0056  | 0.0036  | <0.0001 | <0.0001 |         |         |
|           |        | 50-59    | <0.0001 | 0.0029  | >0.9999 |         | >0.9999 | <0.0001 | 0.0121  | >0.9999 | 0.5813  | >0.9999   | >0.9999 | 0.1331  | 0.2497  | <0.0001 | 0.0047  | <0.0001 | <0.0001 | <0.0001 | <0.0001 | <0.0001 | <0.0001 | <0.0001 |
|           |        | 60-69    | <0.0001 | 0.0033  | >0.9999 | >0.9999 |         | <0.0001 | 0.0236  | >0.9999 | 0.5658  | >0.9999   | >0.9999 | 0.0689  | 0.1263  | <0.0001 | 0.0024  | <0.0001 | <0.0001 | <0.0001 | <0.0001 | <0.0001 | <0.0001 | <0.0001 |
|           | Female | 20-29    | >0.9999 | >0.9999 | 0.1396  | <0.0001 | <0.0001 |         | >0.9999 | <0.0001 | 0.0002  | 0.0003    | >0.9999 | >0.9999 | >0.9999 | >0.9999 | >0.9999 | 0.4567  | >0.9999 | >0.9999 | 0.0012  | 0.0006  |         |         |
|           |        | 30-39    | 0.0240  | >0.9999 | >0.9999 | 0.3822  | 0.4223  | 0.0086  |         | 0.7043  | >0.9999 | >0.9999   | >0.9999 | >0.9999 | >0.9999 | 0.0944  | 0.7058  | 0.0015  | 0.0139  | 0.0053  | <0.0001 | <0.0001 |         |         |
|           |        | 40-49    | <0.0001 | 0.0059  | >0.9999 | >0.9999 | >0.9999 | <0.0001 | 0.6092  |         | >0.9999 | >0.9999   | >0.9999 | 0.7223  | >0.9999 | 0.0007  | 0.0450  | <0.0001 | <0.0001 | <0.0001 | <0.0001 | <0.0001 | <0.0001 | <0.0001 |
|           |        | 50-59    | 0.0096  | >0.9999 | >0.9999 | 0.1378  | 0.2580  | 0.0003  | >0.9999 | 0.0556  |         | >0.9999   | >0.9999 | >0.9999 | >0.9999 | 0.0035  | 0.1177  | <0.0001 | <0.0001 | <0.0001 | <0.0001 | <0.0001 | <0.0001 | <0.0001 |
|           |        | 60-69    | 0.0029  | 0.5080  | >0.9999 | >0.9999 | >0.9999 | 0.0001  | >0.9999 | >0.9999 | >0.9999 |           | >0.9999 | >0.9999 | >0.9999 | 0.0021  | 0.0789  | >0.9999 | >0.9999 | >0.9999 | >0.9999 | >0.9999 | >0.9999 | >0.9999 |
| mRNA-1273 | Male   | 20-29    | >0.9999 | >0.9999 | >0.9999 | >0.9999 | >0.9999 | >0.9999 | >0.9999 | >0.9999 | >0.9999 |           | >0.9999 | >0.9999 | >0.9999 | >0.9999 | >0.9999 | >0.9999 | >0.9999 | >0.9999 | >0.9999 | >0.9999 | >0.9999 | >0.9999 |
|           |        | 30-39    | >0.9999 | >0.9999 | >0.9999 | 0.0726  | 0.0413  | >0.9999 | >0.9999 | 0.1553  | >0.9999 | 0.6959    | >0.9999 |         | >0.9999 | >0.9999 | >0.9999 | >0.9999 | >0.9999 | >0.9999 | >0.9999 | >0.9999 | >0.9999 | >0.9999 |
|           |        | 40-49    | >0.9999 | >0.9999 | >0.9999 | 0.0432  | 0.0242  | >0.9999 | >0.9999 | 0.0995  | >0.9999 | 0.5707    | >0.9999 | >0.9999 |         | >0.9999 | >0.9999 | >0.9999 | >0.9999 | >0.9999 | >0.9999 | >0.9999 | >0.9999 | >0.9999 |
|           |        | 50-59    | >0.9999 | >0.9999 | 0.0020  | <0.0001 | <0.0001 | >0.9999 | 0.0010  | <0.0001 | 0.0004  | 0.0001    | >0.9999 | >0.9999 | >0.9999 |         | >0.9999 | >0.9999 | >0.9999 | >0.9999 | >0.9999 | >0.9999 | >0.9999 | >0.9999 |
|           |        | 60-69    | >0.9999 | >0.9999 | >0.9999 | 0.0613  | 0.0343  | >0.9999 | >0.9999 | 0.1414  | >0.9999 | 0.8083    | >0.9999 | >0.9999 | >0.9999 |         | >0.9999 | >0.9999 | >0.9999 | >0.9999 | >0.9999 | >0.9999 | >0.9999 | >0.9999 |
|           | Female | 20-29    | >0.9999 | >0.9999 | 0.0014  | <0.0001 | <0.0001 | >0.9999 | 0.0006  | <0.0001 | 0.0002  | <0.0001   | >0.9999 | >0.9999 | >0.9999 | >0.9999 | >0.9999 |         | >0.9999 | >0.9999 | >0.9999 | >0.9999 | >0.9999 | >0.9999 |
|           |        | 30-39    | >0.9999 | >0.9999 | 0.0118  | <0.0001 | <0.0001 | >0.9999 | 0.0036  | <0.0001 | 0.0011  | 0.0003    | >0.9999 | >0.9999 | >0.9999 | >0.9999 | >0.9999 | >0.9999 |         | >0.9999 | >0.9999 | >0.9999 | >0.9999 | >0.9999 |
|           |        | 40-49    | >0.9999 | >0.9999 | 0.0187  | <0.0001 | <0.0001 | >0.9999 | 0.0025  | <0.0001 | 0.0003  | <0.0001   | >0.9999 | >0.9999 | >0.9999 | >0.9999 | >0.9999 | >0.9999 | >0.9999 |         | >0.9999 | >0.9999 | >0.9999 | >0.9999 |
|           |        | 50-59    | >0.9999 | 0.0314  | <0.0001 | <0.0001 | <0.0001 | 0.0004  | <0.0001 | <0.0001 | <0.0001 | <0.0001   | >0.9999 | >0.9999 | >0.9999 | >0.9999 | >0.9999 | >0.9999 | >0.9999 | >0.9999 |         | >0.9999 | >0.9999 | >0.9999 |
|           |        | 60-69    | >0.9999 | 0.2223  | <0.0001 | <0.0001 | <0.0001 | 0.0410  | <0.0001 | <0.0001 | <0.0001 | <0.0001   | >0.9999 | >0.9999 | >0.9999 | >0.9999 | >0.9999 | >0.9999 | >0.9999 | >0.9999 |         | >0.9999 | >0.9999 | >0.9999 |
|           |        | Day 240  |         |         |         |         |         |         |         |         |         |           |         |         |         |         |         |         |         |         |         |         |         |         |

**Supplemental Figure 1. Significant differences between groups classified by vaccine type, age, and gender.** *p*-values for all comparisons after a Kruskal Wallis test and Dunn’s multiple comparisons test are indicated in comparisons on day 30 (top right-hand side) and day 240 (bottom left-hand side). The four shades of orange, from light to dark, indicate the significance levels  $p < 0.05$ ,  $p < 0.01$ ,  $p < 0.001$ , and  $p < 0.0001$ , respectively.
